# Supplementary material for: Exercise Intervention Mitigates Pathological Liver Changes in NAFLD Zebrafish by Activating SIRT1/AMPK/NRF2 Signaling
Source: MDPI journal article supplement (doi:10.3390/ijms222010940), 2021-10-10
Supplement: s1 [file s1]

Table S1. The primers used in this study.

| Primer                          | Forward                 | Reverse                 |
|---------------------------------|-------------------------|-------------------------|
| <i><math>\beta</math>-actin</i> | GTCATCACCATCGGCAAT      | CGTGGATACCGCAAGATT      |
| <i>acaca</i>                    | CGGGCTCGAGACAAGTTTGA    | GCTCCCAAGTACAGGTGCAT    |
| <i>srebf1</i>                   | AGTTCTCCGACGCTCTTG      | TGACCACCACCACCATTG      |
| <i>fasn</i>                     | AAACTGCACGAGGTGTGTGA    | ATGCGAAGGTTTAGCCCTCT    |
| <i>pparg</i>                    | CTGCCGCATACACAAGAAGA    | TCACGTCACTGGAGAACTCG    |
| <i>pgc1<math>\alpha</math></i>  | GCGAGGGAACGAGTGGATT     | CTCTCCACCCGAATCCTGA     |
| <i>pparab</i>                   | ATGTCCCACAATGCCATCCG    | TCTGCTTGCCAGGGTTTTC     |
| <i>cpt1</i>                     | TGGCACTGCAACTAGCTCAA    | AACCTCTGCTCATTCTGGT     |
| <i>acox1</i>                    | TGGATCCCATTAGCTGAGTCATT | TTGAGGTTTTACCCAATCCACCT |
| <i>tnfa</i>                     | AGGAGAGTTGCCTTTACCGC    | GTGAGTCTCAGCACACTTCCA   |
| <i>il1<math>\beta</math></i>    | GATCCGCTTGCAATGAGCTAC   | TCAGGGCGATGATGACGTTT    |
| <i>capase3</i>                  | TCTACAATGACCAGACAGTTG   | AAGACTTGAGATCCACAGATG   |
| <i>bax</i>                      | GGCTATTTCAACCAGGGTTCC   | TGCGAATCACCAATGCTGT     |
| <i>bcl2</i>                     | CTTTCAAAGCGAGGATATGTG   | CTATCAGGCATTGAGTTGT     |
| <i>nqo1</i>                     | GCAGAATCCCGAGCACTTTG    | TTCTTCTGCGATCAGCTGAAAG  |
| <i>ho-1</i>                     | ACAGAGACTGAGAGAGATTGGC  | TCTATTGGCGCTCGTCACTC    |
| <i>cat</i>                      | CATCCAGAAACGCATGGTGC    | ACGCTCCACCACGTGAATAA    |
